# Supplementary material for: Differences between problematic internet and smartphone use and their psychological risk factors in boys and girls: a network analysis
Source: PubMed Central journal article supplement (PMC10262453; doi:10.1186/s13034-023-00620-z), 2023-06-12

# Supplementary Figure S2.

## Edge weights differences test results

1a (PIU)

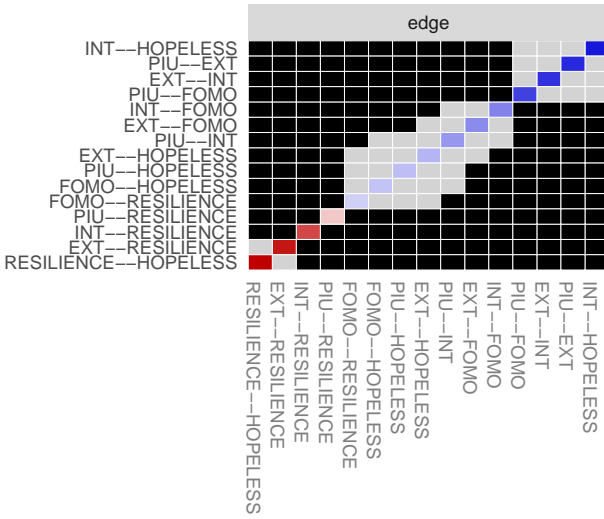

1a (PSU)

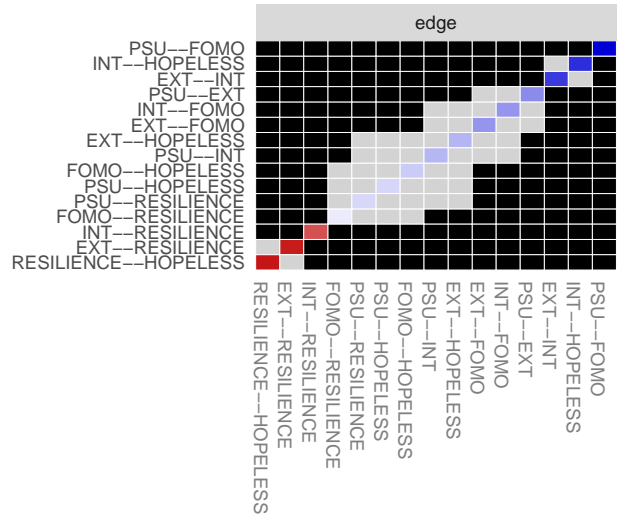

2a (PIU)

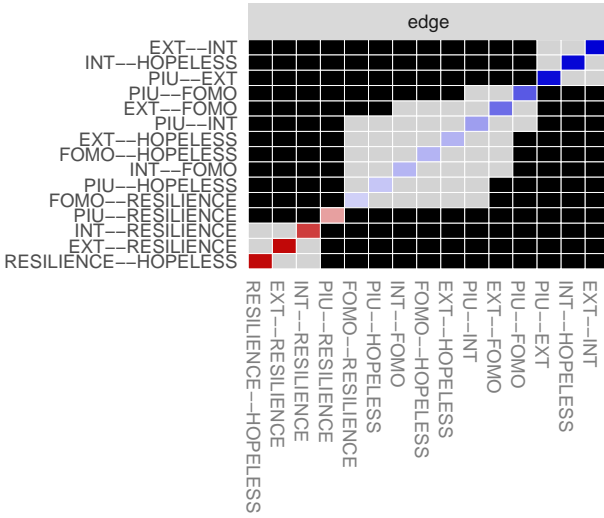

2a (PSU)

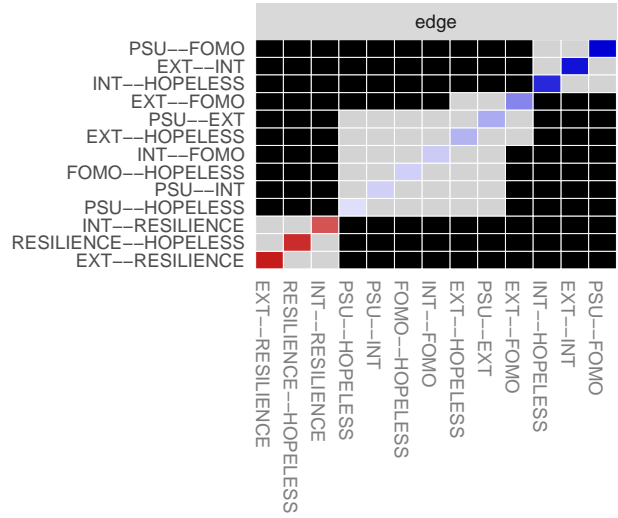

3a (PIU)

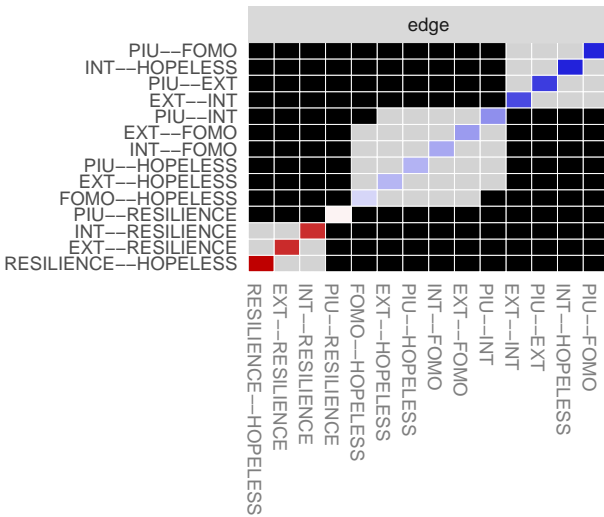

3a (PSU)

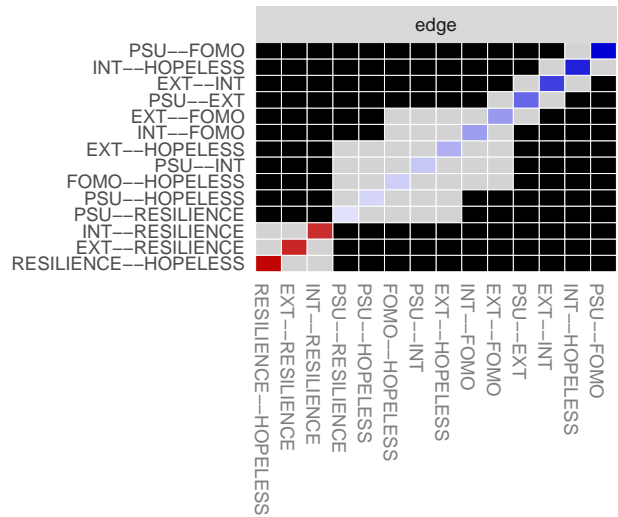

Supplement: 13034_2023_620_MOESM2_ESM.pdf [file 13034_2023_620_MOESM2_ESM.pdf]
