# Supplementary material for: Differences between problematic internet and smartphone use and their psychological risk factors in boys and girls: a network analysis
Source: PubMed Central journal article supplement (PMC10262453; doi:10.1186/s13034-023-00620-z), 2023-06-12

# Supplementary Figure S3.

## Centrality difference test results

### 1a (PIU)

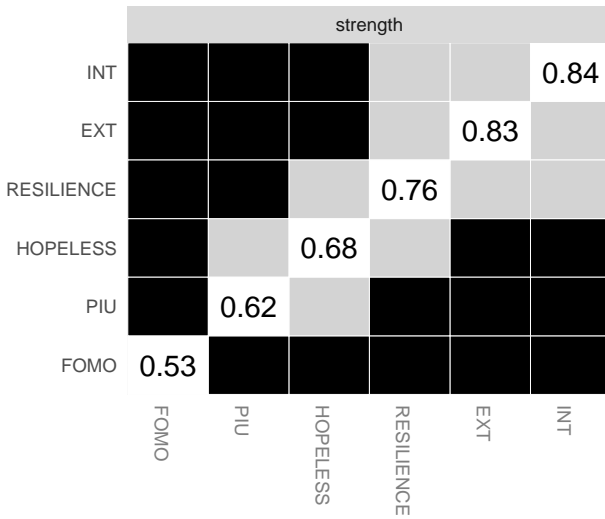

### 1a (PSU)

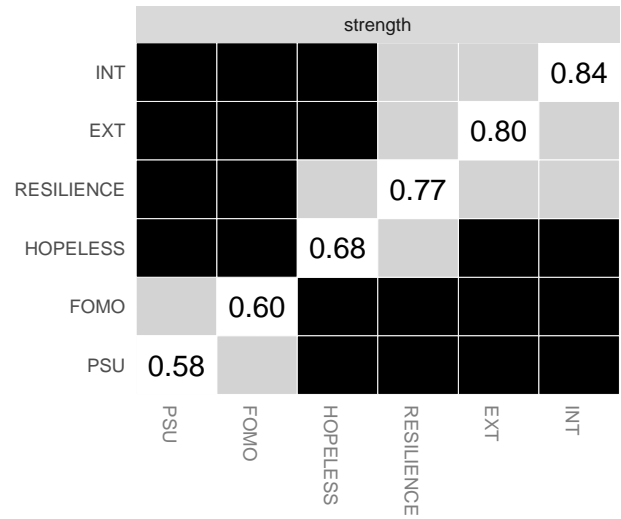

### 2a (PIU)

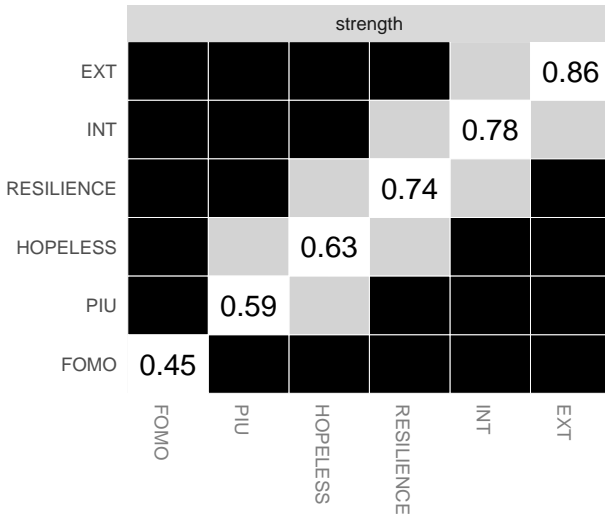

### 2a (PSU)

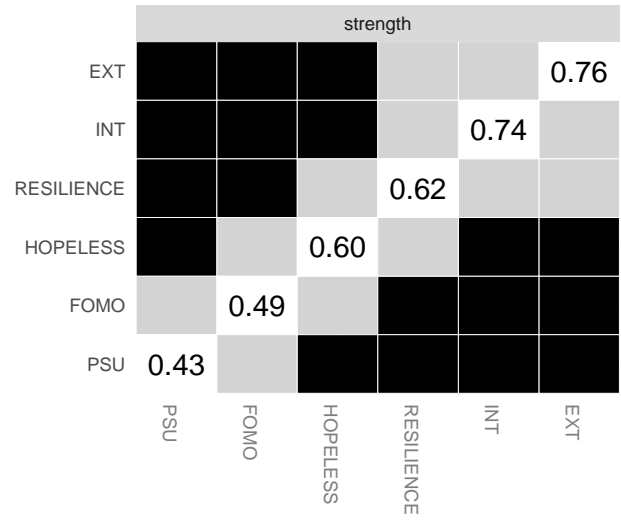

### 1a (PIU)

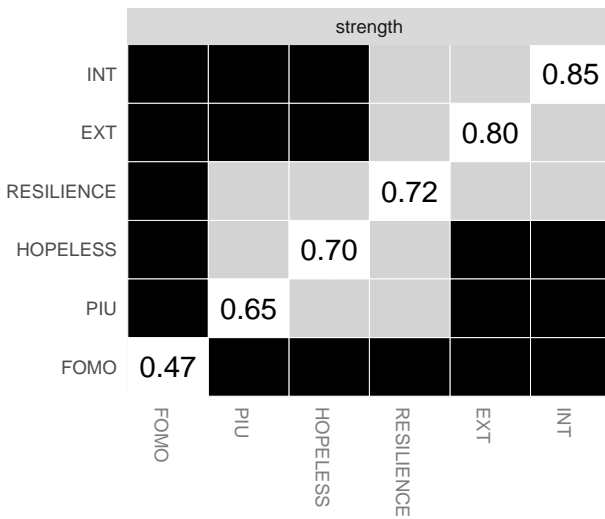

### 2a (PSU)

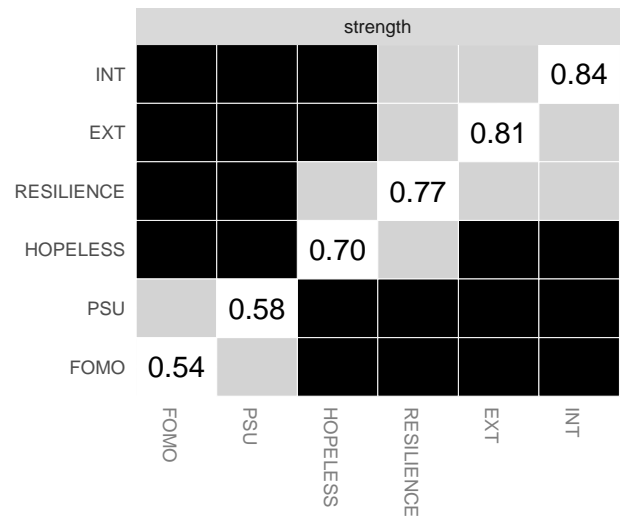

Supplement: 13034_2023_620_MOESM3_ESM.pdf [file 13034_2023_620_MOESM3_ESM.pdf]
