# Supplementary material for: Differences between problematic internet and smartphone use and their psychological risk factors in boys and girls: a network analysis
Source: Springer Nature journal article supplement (doi:10.1186/s13034-023-00620-z), 2023-06-12

# Supplementary Figure S1.

## Bootstrapped edge weights (95% CIs)

### 1a (PIU)

● Bootstrap mean ● Sample

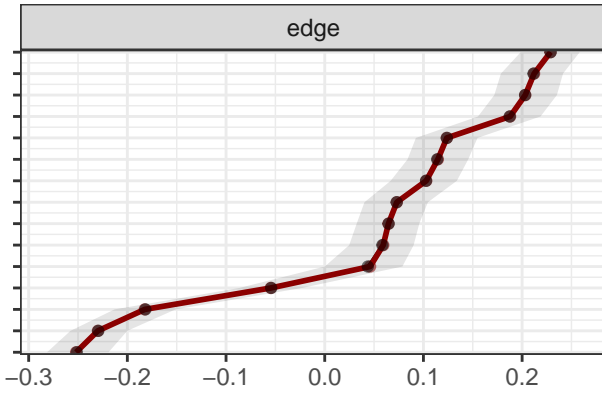

### 1a (PSU)

● Bootstrap mean ● Sample

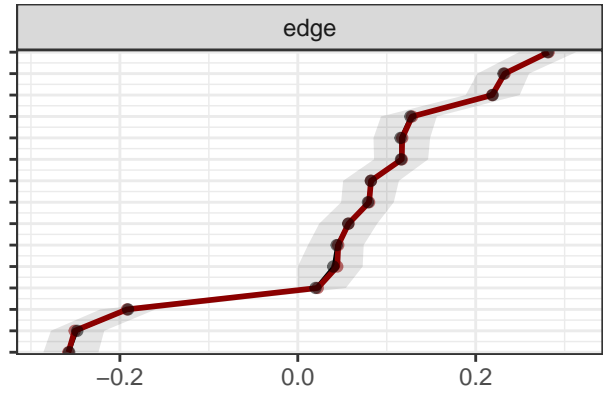

### 2a (PIU)

● Bootstrap mean ● Sample

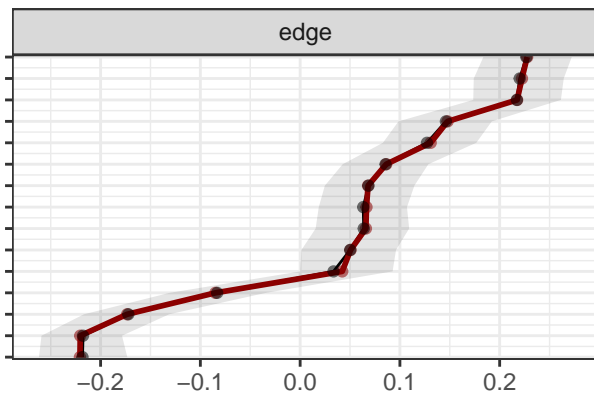

### 2a (PSU)

● Bootstrap mean ● Sample

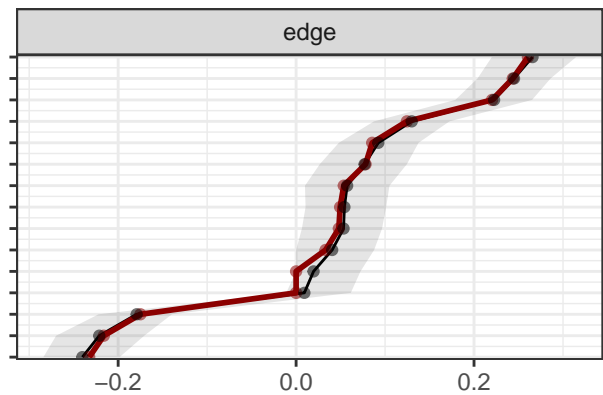

### 3a (PIU)

● Bootstrap mean ● Sample

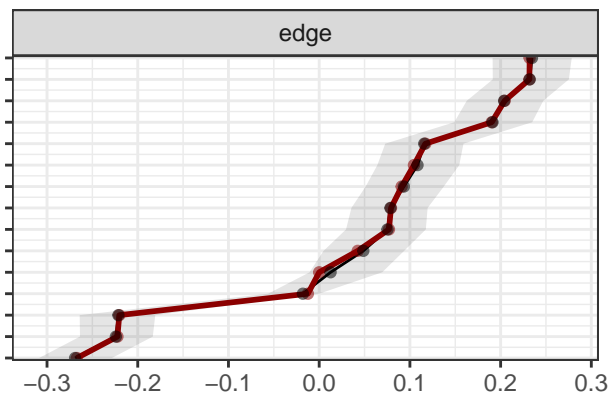

### 3a (PSU)

● Bootstrap mean ● Sample

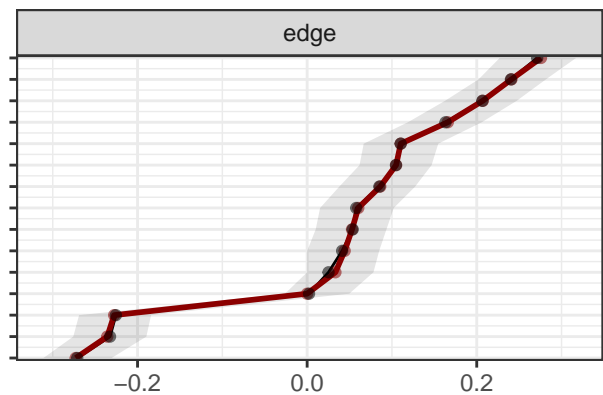

Supplement: MOESM1 [file 25477378]
